# Supplementary material
Source: HighWire-hosted journal article supplement (https://bmjopen.bmj.com/content/12/6/e058075)

**Supplementary Material 2: search strategie and PRISMA flow chart for included studies****A. Search strategie****1. Pubmed (N=688)**

**Search date:** from January 2000 to July 2021

**Search terms:**

1#. ("BP-DES"[MeSH Terms] OR "BP-DES"[All Fields] OR "biodegradable "[All Fields] OR "bioabsorbable "[All Fields] OR "bioabsorbable polymer drug-eluting stent"[All Fields] OR "biodegradable polymer drug-eluting stent"[All Fields]) AND ("acute coronary syndrome"[All Fields] OR "ACS"[All Fields] OR "AMI"[All Fields] OR "Acute myocardial infarction"[All Fields] OR "Non ST segment elevation myocardial infarction"[All Fields] OR "ST segment elevation myocardial infarction"[All Fields] OR "NSTEMI"[All Fields] OR "STEMI"[All Fields])

2#. ("DP-DES"[All Fields] OR "DP-DES"[MeSH Terms] OR "durable polymer"[All Fields] OR "durable polymer drug-eluting stent"[All Fields] ) AND ("acute coronary syndrome"[All Fields] OR "ACS"[All Fields] OR "AMI"[All Fields] OR "Acute myocardial infarction"[All Fields] OR "Non ST segment elevation myocardial infarction"[All Fields] OR "ST segment elevation myocardial infarction"[All Fields] OR "NSTEMI"[All Fields] OR "STEMI"[All Fields])

3#. ("BP-DES"[MeSH Terms] OR "BP-DES"[All Fields] OR "biodegradable "[All Fields] OR "bioabsorbable "[All Fields] OR "bioabsorbable polymer drug-eluting stent"[All Fields] OR "biodegradable polymer drug-eluting stent"[All Fields]) and ("DP-DES"[All Fields] OR "DP-DES"[MeSH Terms] OR "durable polymer"[All Fields] OR "durable polymer drug-eluting stent"[All Fields] ) AND ("acute coronary syndrome"[All Fields] OR "ACS"[All Fields] OR "AMI"[All Fields] OR "Acute myocardial infarction"[All Fields] OR "Non ST segment elevation myocardial infarction"[All Fields] OR "ST segment elevation myocardial infarction"[All Fields] OR "NSTEMI"[All Fields] OR "STEMI"[All Fields])

**2. OVID (N=207, EMBS=134, MEDLINE=54, Controlled Register of Trials=19)**

**Search date:** from January 2000 to July 2021

**Search terms:**

1#.( "BP-DES" OR "bioabsorbable polymer drug-eluting stent" OR "biodegradable polymer drug-eluting stent" ) and ( "acute coronary syndrome" OR "ACS" OR "AMI" OR "Acute myocardial infarction" OR "Non ST segment elevation myocardial infarction" OR "ST segment elevation myocardial infarction" OR "NSTEMI" OR "STEMI" )

2#.( "DP-DES" OR "durable polymer drug-eluting stent" ) and ( "acute coronary syndrome" OR "ACS" OR "AMI" OR "Acute myocardial infarction" OR "Non ST segment elevation myocardial infarction" OR "ST segment elevation myocardial infarction" OR "NSTEMI" OR "STEMI" )

3#.( "BP-DES" OR "bioabsorbable polymer drug-eluting stent" OR "biodegradable polymer drug-eluting stent" ) and ( "DP-DES" OR "durable polymer drug-eluting stent" ) and ( "acute coronary syndrome" OR "ACS" OR "AMI" OR "Acute myocardial infarction" OR "Non ST segment elevation myocardial infarction" OR "ST segment elevation myocardial infarction" OR "NSTEMI" OR "STEMI" )

#### B. PRISMA flow chart for studies included in the meta-analysis

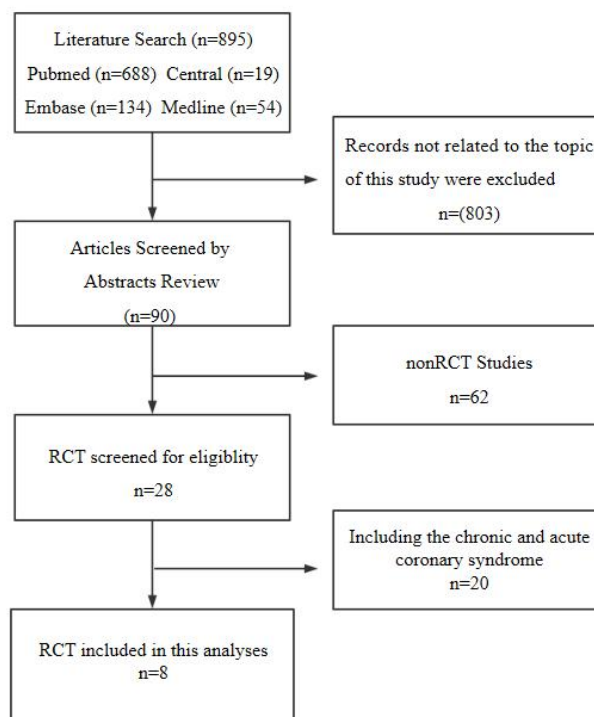

Supplement: inline-supplementary-material-1 [file inline-supplementary-material-1.pdf]
