# Supplementary material
Source: HighWire-hosted journal article supplement (https://bmjopen.bmj.com/content/12/6/e058075)

**Supplementary Material 2. Risk-of-bias summary for included trials**

**A.**

| Unique ID | Study ID           | D1 | D2 | D3 | D4 | D5 | Overall |   |
|-----------|--------------------|----|----|----|----|----|---------|---|
| meta1     | Hyo-Soo Kim        | +  | +  | +  | +  | +  | +       | + |
| meta2     | Thomas Pilgrim     | +  | +  | +  | +  | +  | +       | + |
| meta3     | Juan F Iglesias    | !  | +  | +  | +  | +  | +       | ! |
| meta4     | Thomas Pilgrim     | +  | +  | +  | +  | +  | +       | + |
| meta5     | Yao-Jun Zhang      | +  | +  | +  | +  | !  | +       | ! |
| meta6     | Hyun Jong Lee      | +  | +  | +  | +  | +  | +       | + |
| meta7     | Antoinette de Waha | +  | !  | +  | +  | !  | +       | ! |
| meta8     | QI ZHANG           | !  | !  | +  | +  | !  | +       | ! |

  

|    |                                            |
|----|--------------------------------------------|
| +  | Low risk                                   |
| !  | Some concerns                              |
| -  | High risk                                  |
| D1 | Randomisation process                      |
| D2 | Deviations from the intended interventions |
| D3 | Missing outcome data                       |
| D4 | Measurement of the outcome                 |
| D5 | Selection of the reported result           |

**B.**

As percentage (intention-to-treat)

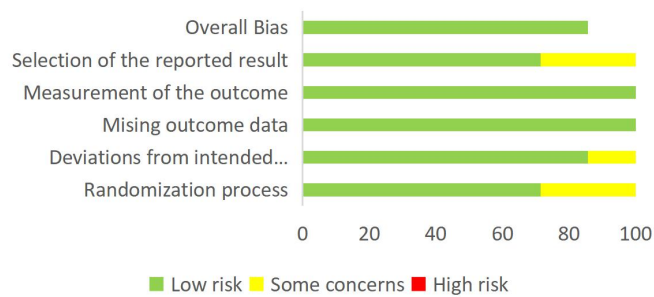

Supplement: inline-supplementary-material-3 [file inline-supplementary-material-3.pdf]
